# Supplementary material
Source: publisher figshare collection journal article supplement (https://acs.figshare.com/ndownloader/files/21822549)
Supplement: Supplementary file 1 [file 21822549]

Supplement paper in “ACS-Omega”

## Corrosion resistance and biocompatibility assessment of a biodegradable hydrothermal- coated Mg-Zn-Ca alloy: an in vitro and in vivo study

Zheng XI<sup>a1</sup>, Yunfeng WU<sup>b1</sup>, Shouyang XIANG<sup>c</sup>, Chu SUN<sup>a</sup>, Yongxuan WANG<sup>d</sup>, Haiming YU<sup>a</sup>, Yu FU<sup>a</sup>, Xintao WANG<sup>c</sup>, Jinglong YAN<sup>c</sup>, Dewei ZHAO<sup>d\*</sup>, Yaming WANG<sup>b\*</sup>, Nan ZHANG<sup>a\*</sup>

a. The Second Affiliated Hospital of Qiqihar Medical University, Qiqihar, Heilongjiang, People's Republic of China;

b. Institute for Advanced Ceramics, Harbin Institute of Technology, Harbin, Heilongjiang, People's Republic of China;

c. The Second Affiliated Hospital of Harbin Medical University, Harbin, Heilongjiang, People's Republic of China;

d. Affiliated Zhongshan Hospital of Dalian University, Dalian, Liaoning, People's Republic of China.

<sup>1</sup>These authors contributed equally to this work.

Zhn1979-08@163.com

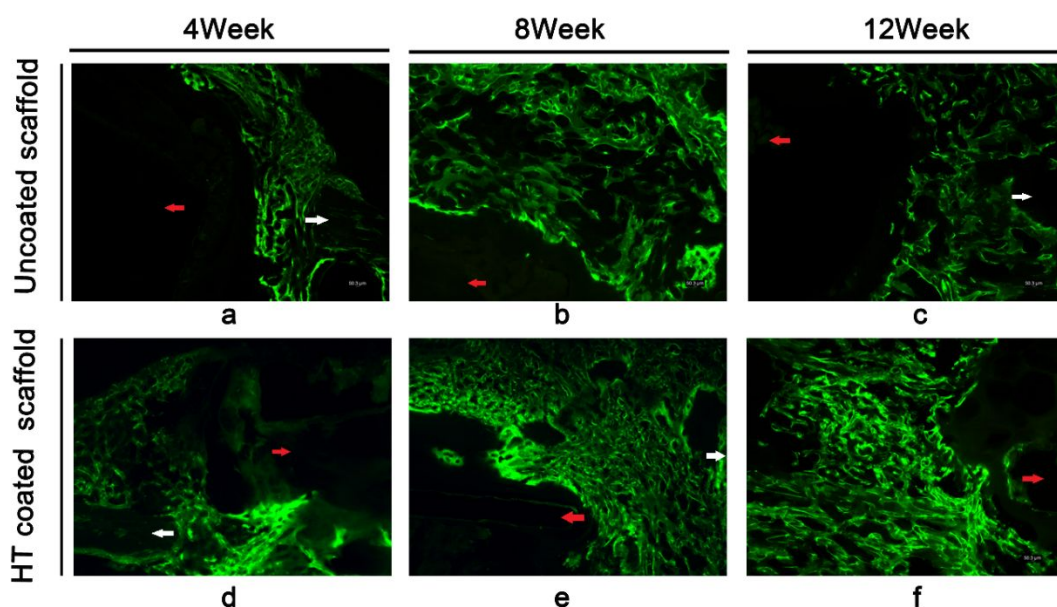

Figure.S1. Images of calcein green fluorescence around the scaffold-bone interfaces at 4, 8 and 12 weeks after implantation. (a, b, c) Uncoated scaffold. (d, e, f) HT-coated scaffold. The fluorescence identifies sedimentary calcium and newly formed bone. Red arrows indicate the original positions of the scaffolds. White arrows indicate the cut ends of the ulnae.

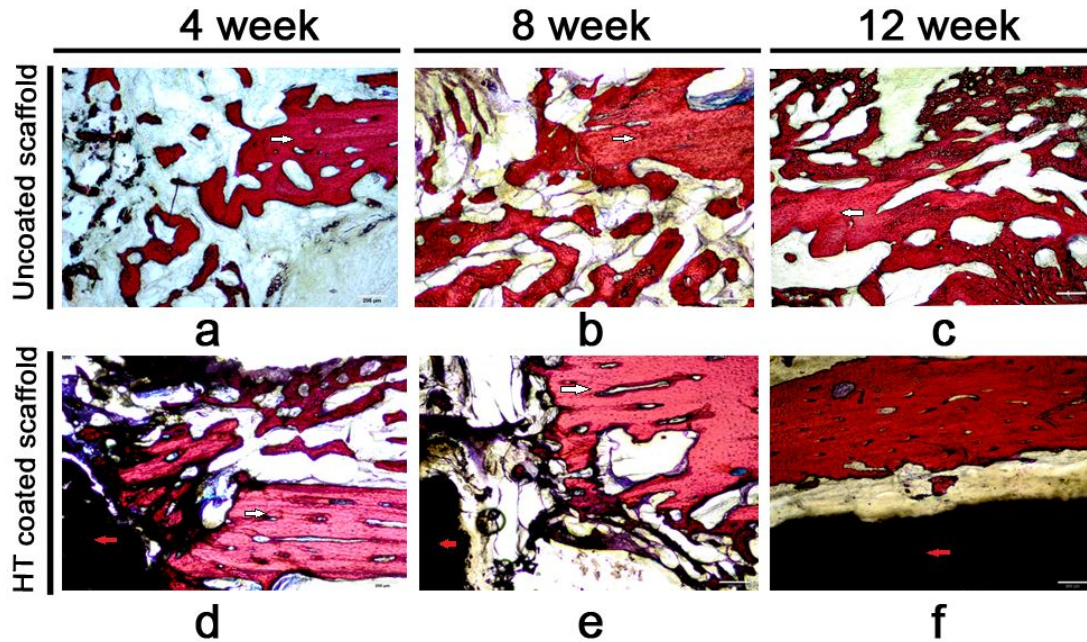

Figure. S2. Histological images of the scaffold/bone interfaces at 4, 8 and 12 weeks after surgery. (a, b, c) Uncoated scaffold. (d, e, f) HT-coated scaffold. Red arrows indicate the original positions of the scaffolds. White arrows indicate the cut ends of the ulnae. Cells labeled blue were chondrocytes, and cells labeled red were osteocytes.
